# Supplementary material for: Affinity Resins for the Isolation of Immunoglobulins G Obtained Using Biocatalytic Technology
Source: MDPI journal article supplement (doi:10.3390/ijms25031367), 2024-01-23
Supplement: s1 [file s1]

## Supplementary Material

### Affinity resins for isolation of immunoglobulins G obtained via biocatalytic technology

Mikhail N. Tereshin <sup>1,2</sup>, Tatjana D. Melikhova <sup>1</sup>, Barbara Z. Eletskaia <sup>1</sup>, Olga B. Ksenofontova <sup>1</sup>, Pavel V. Pantyushenko <sup>1</sup>, Maria Ya. Berzina <sup>1,\*</sup>, Igor Ivanov <sup>2</sup>, Igor V. Myagkikh <sup>1</sup> and Vasilij N. Stepanenko <sup>1,2</sup>

<sup>1</sup> M.M. Shemyakin and Yu.A. Ovchinnikov Institute of Bioorganic Chemistry, Russian Academy of Sciences (IBCh RAS), Miklukho-Maklaya street, 16/10, 117437, Moscow, Russia; misha060596@gmail.com (M. N. T.); tdm-63@yandex.ru (T. D. M); fraubarusya@gmail.com (B. Z. E.); labpeptos@gmail.com (O. B. K); pantyushenko.pavel@gmail.com (P. V. P.); berzina\_maria@mail.ru (M. Ya. B.); myagkikh@ibch.ru (I. V. M.); svn@ibch.ru (V. N. S.)

<sup>2</sup> Lomonosov Institute of Fine Chemical Technologies, MIREA - Russian Technological University, Vernadskogo pr. 86, 119571 Moscow, Russia; igor\_ivanov@gmx.de

### Table of Content

|                                                                      |    |
|----------------------------------------------------------------------|----|
| <sup>1</sup> H spectrum of compound Boc-Gly-Gly-Gly-Gly-OH (9)       | S1 |
| <sup>1</sup> H spectrum of compound Boc-Gly-Gly-EDA-Gly-Gly-Boc (12) | S2 |

## SI-1 Boc-Gly<sub>4</sub>-OH

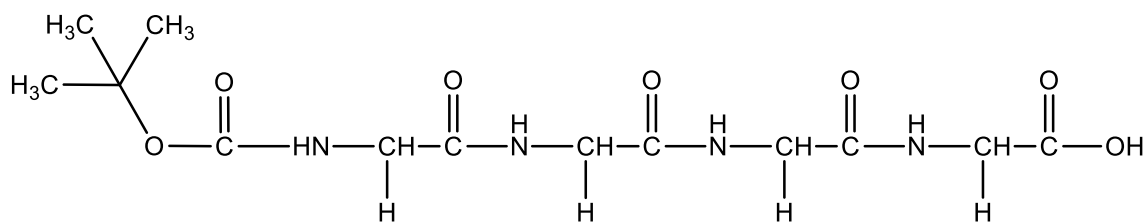

Chemical Formula: C<sub>13</sub>H<sub>22</sub>N<sub>4</sub>O<sub>7</sub>

Molecular Weight: 346,34

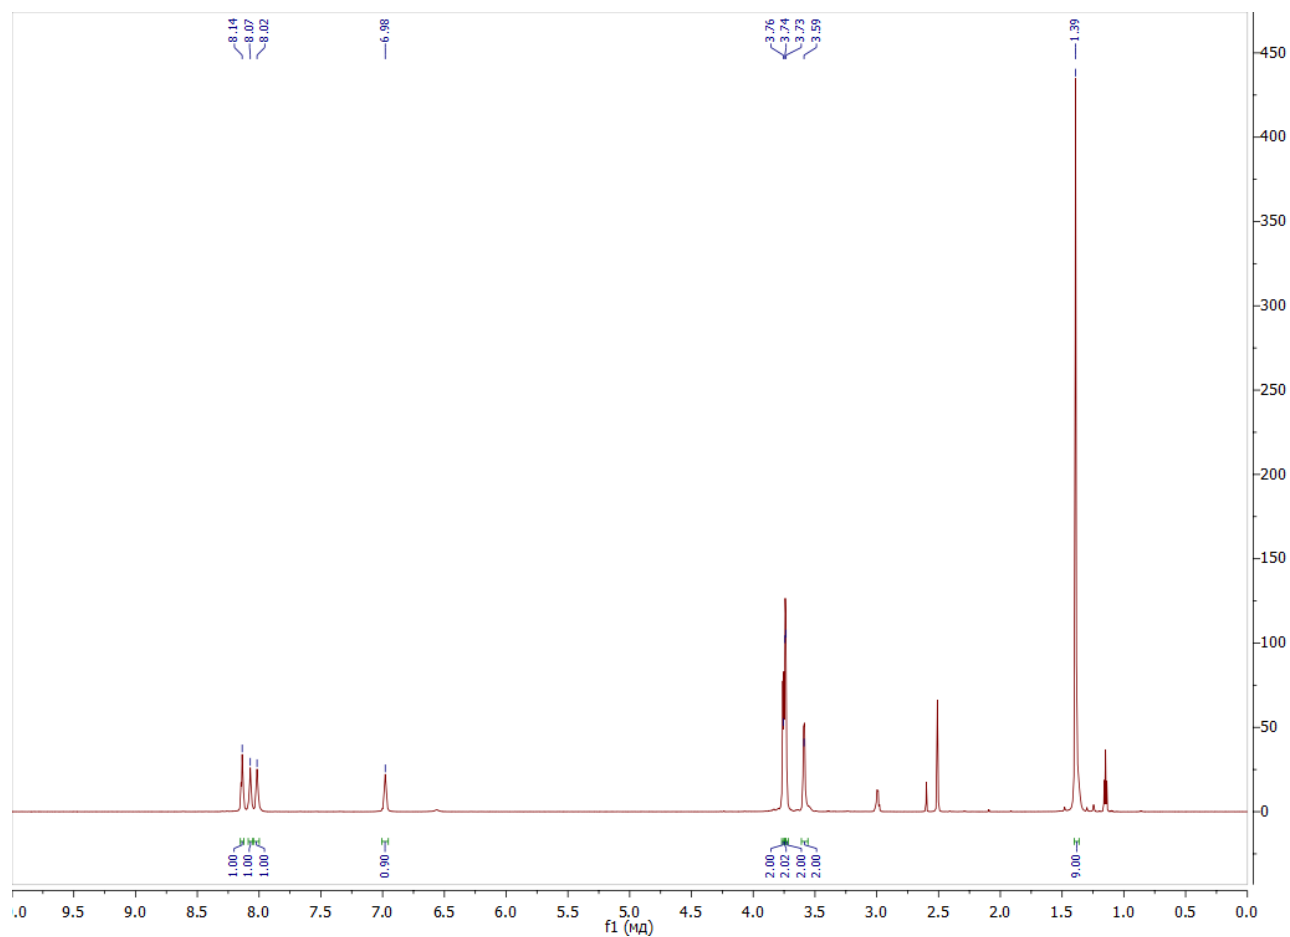

**Figure S1.** The <sup>1</sup>H NMR spectrum of Boc-Gly<sub>4</sub>-OH

## SI-2 Boc-Gly-Gly-EDA-Gly-Gly-Boc

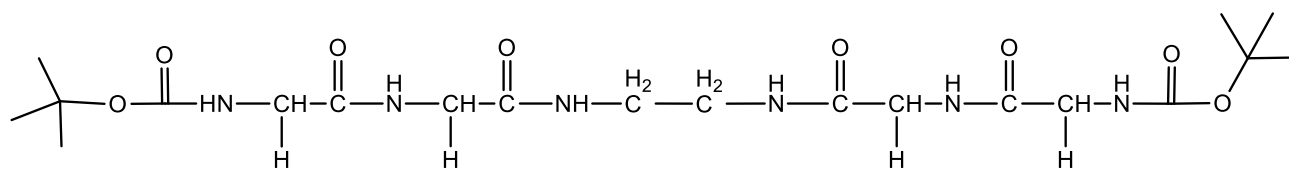

Chemical Formula:  $C_{20}H_{36}N_6O_8$

Exact Mass: 488,26

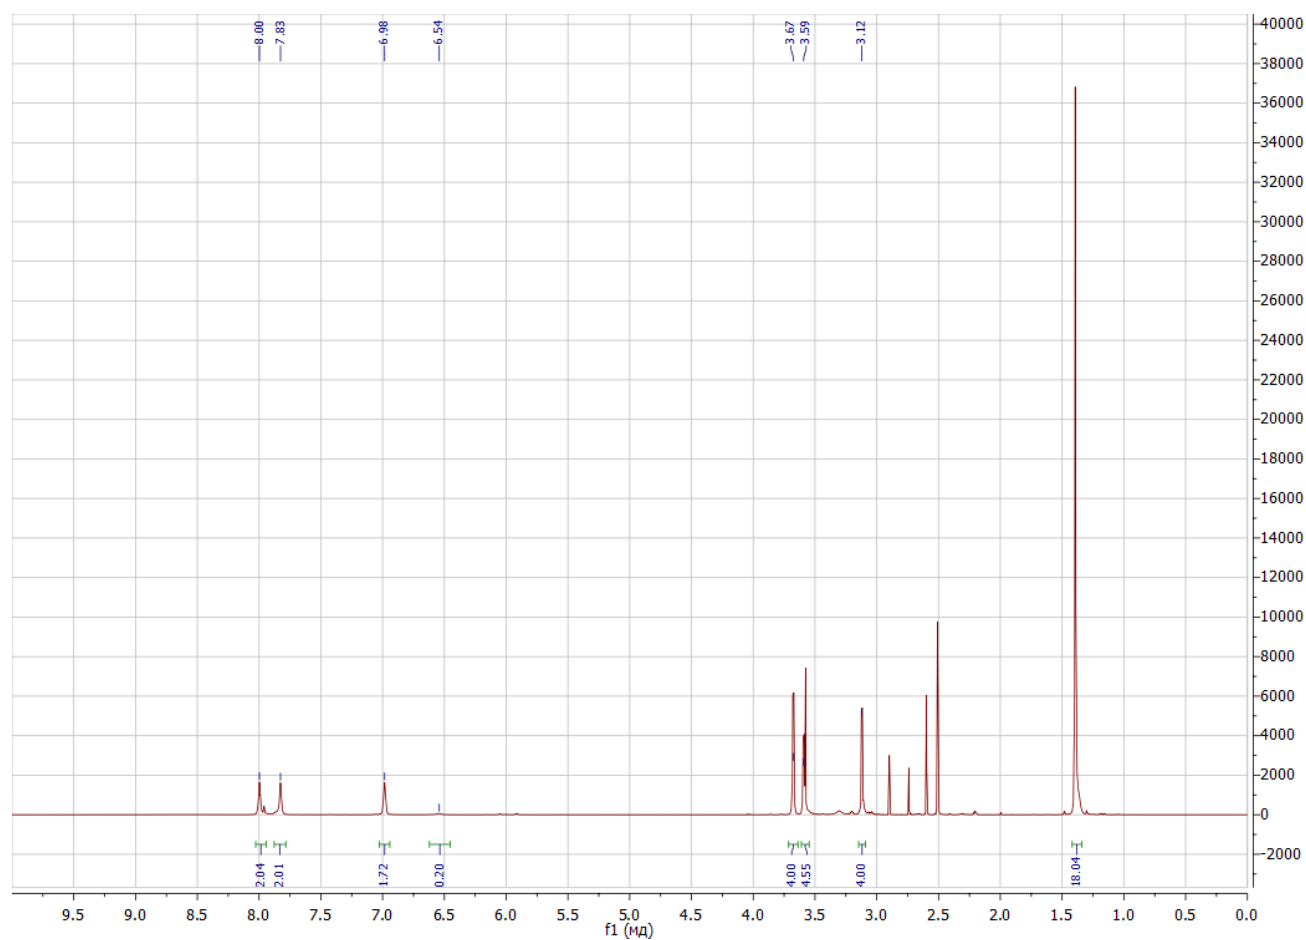

**Figure S2.** The  $^1H$  NMR spectrum of Boc-Gly-Gly-EDA-Gly-Gly-Boc
